# Supplementary material for: Online volunteer laboratories for human subjects research
Source: PubMed Central journal article supplement (PMC6713332; doi:10.1371/journal.pone.0221676), 2019-08-28
Supplement: pone.0221676.s001.pdf [file pone.0221676.s001.pdf]

Appendices for *Online Volunteer Laboratories for  
Human Subjects Research*

S1 Appendix: DLABSS Operations

1 This appendix provides additional information on the operations and properties of the  
2 volunteer lab used in this paper, the Harvard Digital Lab for the Social Sciences (DLABSS).  
3 DLABSS was created in 2014 with the principle that volunteer online subjects should be a  
4 public good to researchers with diverse substantive interests. DLABSS is staffed by several  
5 part-time researchers, including a faculty member and graduate and undergraduate students.  
6 The basic structure is a website that serves as a clearinghouse for experimental and other  
7 survey-based behavioral and social science studies. The research instruments are not directly  
8 hosted on DLABSS, rather staff curate links to the instruments along with basic descrip-  
9 tions on the website. This simple structure allows researchers to host their instruments on  
10 any other convenient platform, such as Qualtrics or an application built specifically for the  
11 research. Using Qualtrics, the lab collects basic demographic and attitudinal data on all  
12 subjects in the lab. This simple structure of the lab allows researchers to collect response  
13 data for virtually any type of experimental, survey-based research question.

14 Subjects are recruited using a variety of methods, including organic web search, paid  
15 search, social media, and email. Thus far, Craigslist, Reddit, social media, and targeted  
16 ad campaigns on email newsletters for specific demographic groups have been the primary  
17 channels for recruiting new subjects.

18 Specific studies are often used to attract subjects and, as such, subjects for a given study  
19 usually consist of two types: 1) new subjects that enter an experiment after being recruited  
20 from the web and 2) subjects from the existing subject pool who enter an experiment after  
21 being directly solicited, usually by email. DLABSS staff email a fraction of the active  
22 subject pool each week to invite them to participate in the latest studies. Subjects are  
23 emailed biweekly on average. These email solicitations can allow a researcher to shape her  
24 subject pool, if desired, by targeting certain populations based on known covariates. In  
25 this manner, DLABSS shares this targeting ability with other opt-in internet panels, but  
26 maintains the low-cost structure of crowd-sourced research. Figures B and A depict the

Figure A: United States Distribution of DLABSS Volunteer Subjects

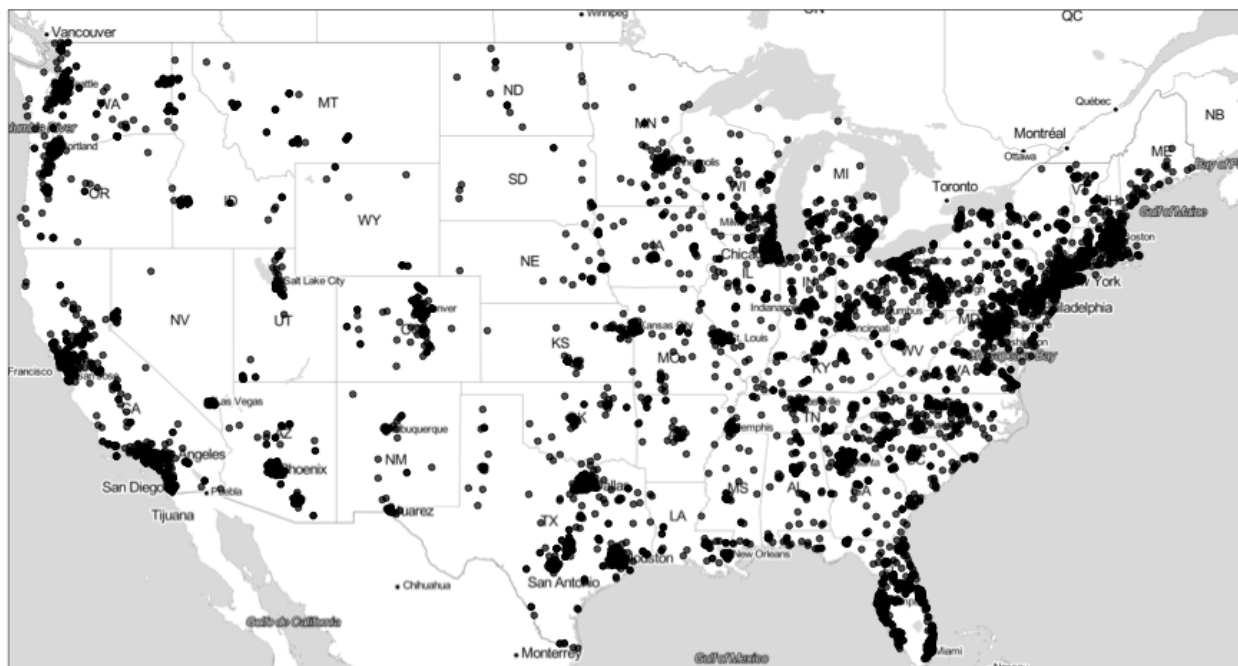

*A total of 10,506 points are plotted on this map, each one representing a single DLABSS participant.*

27 geographic locations of DLABSS volunteers

28 Since its inception, DLABSS has hosted over 100 studies using human subjects. 35%  
29 of these were Harvard faculty projects, 60% were graduate student projects, and 5% were  
30 undergraduate student projects. As of July 2019, the active DLABSS volunteer pool includes  
31 over 16,500 subjects. This means that since its inception, DLABSS has attracted almost 10  
32 new subjects per day. Notably, these descriptive figures include weekends and summer and  
33 other academic holidays, and subject recruitment is significantly higher during the periods  
34 of the academic calendar where DLABSS staff are working. Subject acquisition discussed  
35 above is linked to the nature and diversity of research studies hosted on DLABSS.

36 Prior to beginning operation, DLABSS secured approval from an institutional review  
37 board to recruit subjects and collect demographic data. Researchers using the lab secure  
38 human subjects approval for their individual studies. The use of deception in studies is left  
39 to the discretion of the researcher. Studies have come from a variety of disciplines, including

Figure B: World-wide Distribution of DLABSS Volunteer Subjects

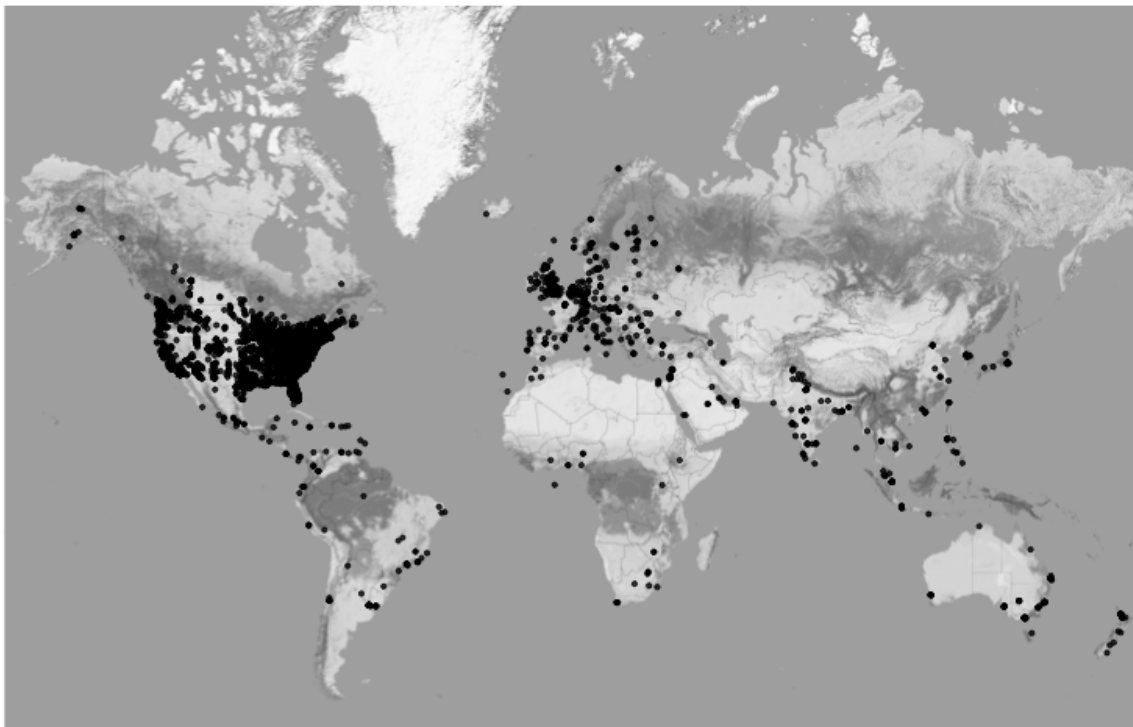

*A total of 11,717 points are plotted on this map, each one representing a single DLABSS participant.*

40 business, economics, sociology, political science, public policy, and psychology. The majority  
41 of studies on DLABSS have been collaborative and have involved two or more researchers.
