# Supplementary material for: Online volunteer laboratories for human subjects research
Source: PubMed Central journal article supplement (PMC6713332; doi:10.1371/journal.pone.0221676), 2019-08-28
Supplement: pone.0221676.s002.pdf [file pone.0221676.s002.pdf]

Appendices for *Online Volunteer Laboratories for  
Human Subjects Research*

S2 Appendix: Supplemental Materials for Study 2

1 This appendix includes additional information on the attributes of the volunteer subjects  
2 used throughout this manuscript. It provides demographic properties of these volunteer  
3 subjects and additional information with respect to their political knowledge and preferences.

4 Table A compares the DLABSS volunteer pool with samples from online convenience  
5 samples used by Berinsky, Huber, and Lenz (2012). Tables B and C compare the political  
6 knowledge and policy attitudes, respectively, of paid and online subjects.

7 Volunteers have political knowledge largely similar to paid MTurk subjects and slightly  
8 higher than the representative ANESP sample. Volunteers report relatively similar policy  
9 attitudes to other survey samples in Table C. The exceptions to this are immigration and  
10 gay marriage attitudes, on which the DLABSS sample reports more liberal attitudes than  
11 some other platforms. However, on immigration DLABSS subjects report attitudes similar to  
12 those of a face-to-face sample from the ANES in 2012. On gay marriage, DLABSS subjects  
13 report attitudes relatively similar to MTurk subjects, who are also more liberal in their  
14 attitudes than nationally representative samples.

Table A: Comparing Subject Properties across DLABSS and Other Convenience Samples

| <i>Demographics</i>    | <i>Convenience samples</i> |              |                                              |                                                     |       |        |
|------------------------|----------------------------|--------------|----------------------------------------------|-----------------------------------------------------|-------|--------|
|                        | <i>DLABSS</i>              | <i>MTurk</i> | <i>Student samples<br/>(Kam et al. 2007)</i> | <i>Adult sample<br/>(Kam et al 2007)</i>            |       |        |
|                        |                            |              |                                              | <i>Adult samples<br/>(Berinsky and Kinder 2006)</i> |       |        |
|                        |                            |              |                                              | <i>Experiment 1: Ann Arbor, MI</i>                  |       |        |
|                        |                            |              |                                              | <i>Experiment 2: Princeton, NJ</i>                  |       |        |
| Female                 | 55.6% (0.7)                | 48.0% (1.9)  | 56.7% (1.3)                                  | 75.7% (4.1)                                         | 66.0% | 57.1 % |
| Age (mean years)       | 44.1 (0.2)                 | 37.8 (0.5)   | 20.3 (8.2)                                   | 45.5 (.916)                                         | 42.5  | 45.3   |
| Education (mean years) | 15.2 (0.0)                 | 14.9 (0.1)   | –                                            | 5.48 (1.29)                                         | 15.1  | 14.9   |
| White                  | 74.7 (0.5)                 | 78.3 (1.6)   | 42.5                                         | 82.2 (3.7)                                          | 81.4  | 72.4   |
| Black                  | 6.4 (0.3)                  | 8.4 (1.0)    |                                              |                                                     | 12.9  | 22.7   |
| Party identification   |                            |              |                                              |                                                     |       |        |
| Democrat               | 46.9 (0.6)                 | 44.3 (1.9)   |                                              |                                                     | 46.1  | 46.5   |
| Independent/Other      | 29.6 (0.6)                 | 30.1 (1.7)   |                                              |                                                     | 37.6  | 27.7   |
| Republican             | 23.5 (0.5)                 | 22.8 (1.6)   |                                              |                                                     | 16.3  | 25.8   |
| N                      | 807-6,280                  | 673-705      | 277-1428                                     | 109                                                 | 141   | 163    |

*DLABSS and MTurk results from December 2016, all other results from Berinsky, Huber, and Lenz (2012). Note that the Education in the Kam et al 2007 sample is a ordinal indicator, rather than years, and is as reported in Berinsky, Huber, and Lenz (2012).*

Table B: Comparing DLABSS sample demographics to internet and face-to-face samples- Political Behavior and Knowledge Attributes

|                                                                 | <i>Internet sample</i> |              |               | <i>Face-to-face sample</i> |
|-----------------------------------------------------------------|------------------------|--------------|---------------|----------------------------|
|                                                                 | <i>DLABSS</i>          | <i>MTurk</i> | <i>ANESP</i>  | <i>ANES 2012</i>           |
| Political Interest                                              | 3.84 (0.03)            | 3.62 (0.04)  | 2.71 (0.02)   | 3.34 (0.03)                |
| Political knowledge (% correct)                                 |                        |              |               |                            |
| Presidential succession after Vice President                    | 67.7 (1.4)             | 60.3 (1.9)   | 65.2 (2.0)    |                            |
| House vote percentage needed to override a veto                 | 75.8 (1.3)             | 87.9 (1.2)   | 73.6 (1.3)    |                            |
| Number of terms to which an individual can be elected president | 89.4 (0.9)             | 97.4 (0.6)   | 92.8 (0.7)    |                            |
| Length of a U.S. Senate term                                    | 51.8 (1.5)             | 62.5 (1.8)   | 37.5 (1.3)    |                            |
| Number of Senators per state                                    | 78.5 (1.2)             | 83.2 (1.4)   | 73.2 (1.2)    |                            |
| Length of a U.S. House term                                     | 51.3 (1.5)             | 49.3 (1.9)   | 38.9 (1.3)    |                            |
| Average                                                         | 69.1                   | 73.5         | 63.5          |                            |
| N                                                               | 909 - 8,122            | 673 - 705    | 2,727 - 3,003 | 2,004 - 2,054              |

*Standard errors are in parentheses. N is a range because of differing missingness across survey questions. Political interest is on a 5-point scale with 5 indicating high interest.*

Table C: Comparing DLABSS sample policy attitudes

|                                                          | <i>DLABSS</i> | <i>MTurk</i> | <i>Internet sample</i><br><i>ANESP</i> | <i>Face-to-face samples</i><br><i>ANES 2012</i> |
|----------------------------------------------------------|---------------|--------------|----------------------------------------|-------------------------------------------------|
| Favor prescription drug benefit for seniors              | 75.7% (1.3)   | 71.6% (1.7)  | 74.8% (1.1)                            |                                                 |
| Favor universal health care                              | 54.5 (1.5)    | 58.8 (1.9)   | 41.7 (1.2)                             |                                                 |
| Favor citizenship process for illegals                   | 62.9 (1.5)    | 48.1 (1.9)   | 42.7 (1.2)                             | 63.7 (1.1)                                      |
| Favor a constitutional amendment banning gay marriage    | 10.2 (0.9)    | 21.3 (1.5)   | 55.4 (1.2)                             | 57.1 (1.1)*                                     |
| Favor raising taxes on people making more than \$200,000 | 69.9 (1.4)    | 67.2 (1.8)   | 55.4 (1.2)                             | 79.3 (0.9)**                                    |
| Favor raising taxes on people making less than \$200,000 | 7.5 (0.8)     | 8.9 (0.1)    | 7.1 (0.6)                              |                                                 |
| N                                                        | 1,041-1,044   | 703-705      | 1,614-1,618                            | 1,995-2,026                                     |

\* *Gay and lesbian couples should be allowed to form civil unions but not legally marry, or there should be no legal recognition of a gay or lesbian couple's relationship*

\*\* *Increasing income taxes on people making over one million dollars per year.*

## References

Berinsky, Adam J, Gregory A Huber, and Gabriel S Lenz. 2012. "Evaluating online labor markets for experimental research: Amazon. com's Mechanical Turk." *Political Analysis* 20(3): 351–368.
