# Supplementary material for: Online volunteer laboratories for human subjects research
Source: PubMed Central journal article supplement (PMC6713332; doi:10.1371/journal.pone.0221676), 2019-08-28
Supplement: pone.0221676.s003.pdf [file pone.0221676.s003.pdf]

Appendices for *Online Volunteer Laboratories for  
Human Subjects Research*

S3 Appendix: Supplemental Materials for Study 3

1 In this appendix, we offer additional information regarding replications conducted on  
2 DLABSS.

### 3 **A Core Replications: 6 Replications Conducted on** 4 **DLABSS Explicitly for this Study**

5 In Tables A, B, C, and D, and in Figure A we display detailed results for the replications  
6 of three well-known studies mentioned in the manuscript.

Table A: Replication of Rasinski (1989) in DLABSS

|   | Platform                     | Poor | Welfare | Difference | p     | n    |
|---|------------------------------|------|---------|------------|-------|------|
| 1 | DLABSS                       | 64   | 39      | 25         | <.001 | 788  |
| 2 | General Social Surveys (GSS) | 64   | 23      | 37         | <.001 | 1470 |
| 3 | MTurk (Berinsky et al. 2012) | 55   | 17      | 38         | <.001 | 329  |

*Cells represent percent of respondents favoring a policy with each frame. P values are from a T-test of difference of means.*

Table B: Replication of Tversky and Kahneman (1981) in DLABSS

|   | Platform                     | Lives Saved | Lives Lost | Difference | p     | n   |
|---|------------------------------|-------------|------------|------------|-------|-----|
| 1 | DLABSS                       | 63          | 34         | 29         | <.001 | 539 |
| 2 | MTurk (Berinsky et al. 2012) | 74          | 38         | 36         | <.001 | 450 |
| 3 | Tversky and Kahneman 1981    | 72          | 22         | 50         | <.001 | 307 |

*Cells are percent of respondents choosing non-probabilistic (certain) outcome with each frame.*

Table C: Replication of Kam and Simas (2010) in DLABSS

|                                            | <i>Kam and Simas (2010)</i> |                              | <i>Berinsky et al.</i>               |                   | <i>DLABSS</i>     |                   |
|--------------------------------------------|-----------------------------|------------------------------|--------------------------------------|-------------------|-------------------|-------------------|
|                                            | <i>(H1a)</i>                | <i>(H1b)</i>                 | <i>(H1a)</i>                         | <i>(H1b)</i>      | <i>(H1a)</i>      | <i>(H1b)</i>      |
| <i>Mortality frame and risk acceptance</i> |                             | <i>(H1b) Adding controls</i> | <i>(H1a) Frame x Risk acceptance</i> | <i>(H1b)</i>      | <i>(H2)</i>       | <i>(H2)</i>       |
| Mortality frame in Trial 1                 | 1.068<br>(0.10)             | 1.082<br>(0.10)              | 1.058<br>(0.29)                      | 1.180<br>(0.10)   | 1.410<br>(0.31)   | 1.437<br>(0.36)   |
| Risk acceptance                            | 0.521<br>(0.31)             | 0.628<br>(0.32)              | 0.507<br>(0.48)                      | 0.780<br>(0.31)   | 0.990<br>(0.42)   | 1.424<br>(0.46)   |
| Female                                     |                             | 0.105<br>(0.10)              |                                      | -0.018<br>(0.11)  |                   | -0.013<br>(0.11)  |
| Age                                        |                             | 0.262<br>(0.22)              |                                      | 0.110<br>(0.31)   |                   | 0.443<br>(0.24)   |
| Education                                  |                             | -0.214<br>(0.20)             |                                      | 0.025<br>(0.23)   |                   | -0.056<br>(0.23)  |
| Income                                     |                             | 0.205<br>(0.23)              |                                      | -0.024<br>(0.23)  |                   | -0.022<br>(0.21)  |
| Partisan ideology                          |                             | 0.038<br>(0.19)              |                                      | 0.006<br>(0.15)   |                   | 0.013<br>(0.13)   |
| Risk acceptance x Mortality frame          |                             |                              | 0.023<br>(0.62)                      |                   | -0.450<br>(0.58)  | -0.827<br>(0.66)  |
| Intercept                                  | -0.706<br>(0.155)           | -0.933<br>(0.259)            | -0.700<br>(0.227)                    | -1.100<br>(0.290) | -1.190<br>(0.230) | -1.309<br>(0.255) |
| N                                          | 752                         | 750                          | 752                                  | 699               | 699               | 634               |

Cells are signs and p-values for probit regressions of individual-level acceptance of probabilistic policy outcomes on risk acceptance attitudes (top row) and other covariates.

Figure A: Replication of Hainmueller and Hiscox (2010): Support for Highly- and Low-skilled Immigration among DLABSS Respondents

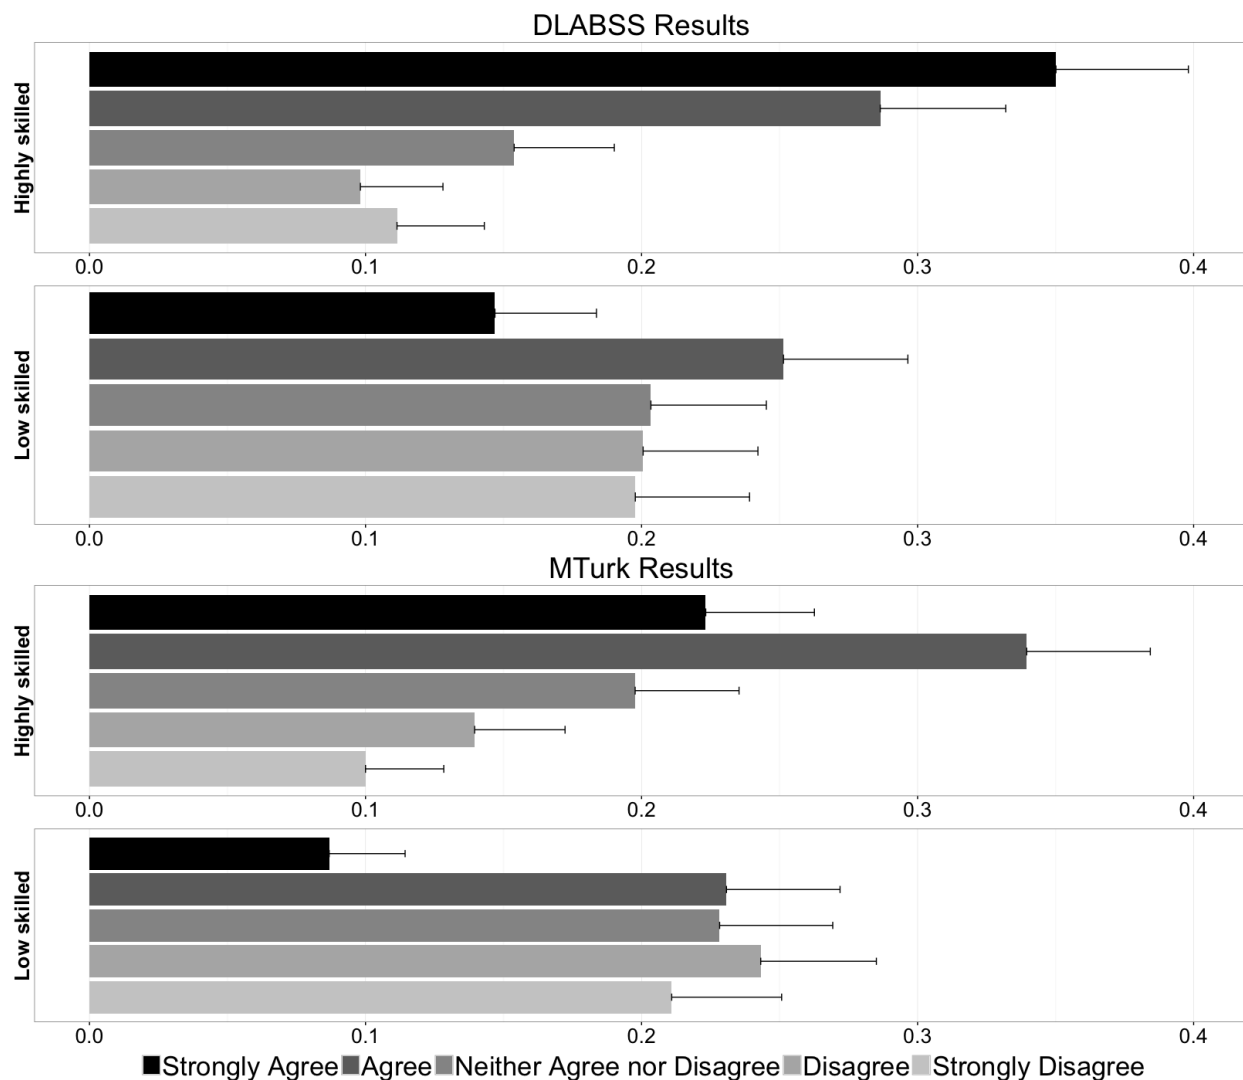

Whiskers are the upper bounds of 95% confidence intervals for proportions. Respondents in the “highly-skilled” group were asked “Do you agree or disagree that the US should allow more highly skilled immigrants from other countries to come and live here? (emphasis added)?” Respondents in the “low-skilled” group were asked “Do you agree or disagree that the US should allow more low-skilled immigrants from other countries to come and live here? (emphasis added)?”

Table D: Replication of Tomz (2007) in DLABSS

| DLABSS Replication of Tomz (2007) Table 1 |                                           |                                          |                                 |                                  |                                           | Tomz (2007 Table 1)                      |                                 |                                  |
|-------------------------------------------|-------------------------------------------|------------------------------------------|---------------------------------|----------------------------------|-------------------------------------------|------------------------------------------|---------------------------------|----------------------------------|
|                                           | Public reaction<br>to empty threat<br>(%) | Public reaction<br>to staying out<br>(%) | Difference<br>in opinion<br>(%) | Summary of<br>differences<br>(%) | Public reaction<br>to empty threat<br>(%) | Public reaction<br>to staying out<br>(%) | Difference<br>in opinion<br>(%) | Summary of<br>differences<br>(%) |
| <b>Disapprove</b>                         |                                           |                                          |                                 |                                  |                                           |                                          |                                 |                                  |
| <i>Disapprove very strongly</i>           | 27<br>(21 to 32)                          | 14<br>(10 to 19)                         | 12<br>(6 to 20)                 | 14<br>(6 to 22)                  | 31<br>(27 to 35)                          | 20<br>(17 to 23)                         | 11<br>(6 to 17)                 | 16<br>(10 to 22)                 |
| <i>Disapprove somewhat</i>                | 30<br>(25 to 36)                          | 15<br>(11 to 20)                         | 15<br>(8 to 23)                 |                                  | 18<br>(14 to 21)                          | 13<br>(10 to 16)                         | 5<br>(0 to 9)                   |                                  |
| <b>Neither</b>                            |                                           |                                          |                                 |                                  |                                           |                                          |                                 |                                  |
| <i>Lean toward disapproving</i>           | 5<br>(3 to 9)                             | 14<br>(10 to 19)                         | -8<br>(-14 to -3)               | -3<br>(-12 to 5)                 | 8<br>(6 to 11)                            | 9<br>(7 to 11)                           | 0<br>(-3 to 3)                  | -4<br>(-9 to 2)                  |
| <i>Don't lean either way</i>              | 10<br>(7 to 14)                           | 13<br>(9 to 17)                          | -2<br>(-8 to 4)                 |                                  | 21<br>(17 to 24)                          | 21<br>(18 to 24)                         | 0<br>(-5 to 4)                  |                                  |
| <i>Lean toward approving</i>              | 12<br>(9 to 17)                           | 12<br>(8 to 16)                          | 0<br>(-5 to 7)                  |                                  | 8<br>(6 to 11)                            | 11<br>(9 to 14)                          | -3<br>(-6 to 0)                 |                                  |
| <b>Approve</b>                            |                                           |                                          |                                 |                                  |                                           |                                          |                                 |                                  |
| <i>Approve somewhat</i>                   | 10<br>(6 to 13)                           | 21<br>(16 to 27)                         | -12<br>(-18 to -5)              | -9<br>(-17 to -2)                | 8<br>(5 to 10)                            | 13<br>(11 to 16)                         | -6<br>(-9 to -2)                | -12<br>(-17 to -8)               |
| <i>Approve very strongly</i>              | 5<br>(3 to 8)                             | 11<br>(8 to 16)                          | -6<br>(-11 to -1)               |                                  | 6<br>(4 to 9)                             | 13<br>(10 to 16)                         | -7<br>(-10 to -3)               |                                  |

The table gives the percentage of respondents who expressed each opinion. Bayesian 95 percent credible intervals appear in parentheses.

## **B Additional Replications: 10 Replications Using DLABSS Reported by Other Researchers**

In the manuscript and in the previous section, we present details on 6 experiments we explicitly replicated for this study. In Table E and the text below, we provide information on 10 additional replications reported by researchers while using DLABSS.

Researchers have used DLABSS volunteers to replicate findings across a range of topics (Tversky and Kahneman 1981, Rasinski 1989, Tomz 2007, Hainmueller and Hiscox 2010, Kam and Simas 2010, Gadarian and Albertson 2014, Krosch et al. 2013, Enos and Carney 2017, Enos and Celaya 2018, Mahler 2016, Hankinson 2018, Bonikowski and Zhang 2017, Kaufman 2018, Kaufman, King and Komisarchik Forthcoming, Saha and Weeks 2018, Mozer et al. 2018). We provide additional details here to offer a broader sense of the variety of research volunteer laboratories can reproduce.

Several studies hosted on DLABSS have explored racial politics. One study (Enos 2017), using both DLABSS and Qualtrics' proprietary survey panel, attempted to replicate findings from prominent recent studies that, using small MTurk samples, found significant links between political ideology and visual perceptions of race (Krosch et al. 2013, Krosch and Amodio 2014). Another study tested how spatial segregation affects perceptions of similarity in human faces across DLABSS and MTurk (Enos and Celaya 2018). Several DLABSS studies also investigated the properties of Modern Racism Scales (Sears and Kinder 1971), finding similar distributions of racial attitudes as those in the Cooperative Campaign Analysis Project (CCAP) survey and replicated experimental results on the nationally representative Time Sharing for Experimental Social Science (TESS) panel and MTurk (Enos and Carney 2017).

Another researcher used DLABSS to study populism. DLABSS and MTurk samples produced similar results, while a Qualtrics panel, which was manipulated to be disproportional,

32 tionately conservative, produced larger effects (Bonikowski and Zhang 2017).

33 In the context of studying blocked randomization designs, a researcher studied a variant of  
34 the Tomz (2007) study referenced above and replicated the results on MTurk and DLABSS  
35 (Tomz 2007, Kaufman and Kim 2017). Another team crowdsourced perceptions of the  
36 compactness of legislative districts on both MTurk and DLABSS with similar results between  
37 the two platforms (Kaufman, King and Komisarchik Forthcoming). Researchers also used  
38 MTurk and DLABSS to validate a computational model of sentiment analysis of survey  
39 questions with similar results across the platforms (Kaufman 2018).

40 Finally, while studying the effects of altruistic voting behavior on voting outcomes, a  
41 researcher used a representative Danish sample from Epinion and replicated the result on  
42 DLABSS with U.S. subjects (Mahler 2016). Another researcher replicated a survey experi-  
43 ment from MTurk on preferences for housing allocation based on the geographic location of  
44 the housing (Hankinson 2018).

Table E: Experimental social science replicated on DLABSS: Additional Studies

| Replicated Study                    | Dependent Variable   | N     | MTurk | N     | Other     | N     |
|-------------------------------------|----------------------|-------|-------|-------|-----------|-------|
| Krosch et al. (2013)                | Perceptions of race  | 204   | ✓     | 31    | Qualtrics | 708   |
| Enos and Carney (2015)              | Racism scales        | 1,478 | ✓     | 4,488 | TESS      | 733   |
| Enos and Celaya (2015)              | Perceptions of race  | 365   | ✓     | 716   |           |       |
| Mahler (2016)                       | Voting outcomes      | 400   |       |       | Epinion   | 2,000 |
| Hankinson (2017)                    | Housing preferences  | 655   | ✓     | 803   |           |       |
| Bonikowski and Zhang (2017)         | Populism             | 642   | ✓     | 421   | Qualtrics | 1,035 |
| Kaufman (2018)                      | Survey bias          | 272   | ✓     | 524   |           |       |
| Kaufman, King and Komisarhik (2018) | District compactness | 373   | ✓     | 764   |           |       |
| Saha and Weeks (2018)               | Candidate ambition   | 550   |       |       | SSI       | 1200  |
| Mozer et al. (2018)                 | Article similarity   | 226   | ✓     | 336   |           |       |

*In the manuscript, we present a table summarizing the 6 replications we conducted explicitly for this study. Here, we present 10 additional replications reported by other researchers while using DLABSS. “Other” column indicates the first sample, of which we are aware, other than MTurk or DLABSS, on which the study was carried out and is not an exhaustive list of replications. The first N column is the number of subjects on DLABSS, the second N is the number of subjects on MTurk, and the third N is the number of subjects on different platforms, where applicable. A \* next to the ✓ for MTurk indicates that we carried out the MTurk replication ourselves.*



## References

- Bonikowski, Bart and Yueran Zhang. 2017. “Populism as dog-whistle politics: Anti-elite discourse and sentiments toward minorities in the 2016 presidential election.” Working Paper, Harvard University.
- Enos, Ryan D. 2017. *The space between us: Social geography and politics*. New York: Cambridge University Press.
- Enos, Ryan D and Christopher Celaya. 2018. “The effect of segregation on intergroup relations.” *Journal of Experimental Political Science* 5(1):26–38.
- Enos, Ryan D. and Riley Carney. 2017. “Conservatism and fairness in contemporary politics: Unpacking the psychological underpinnings of modern racism.” Working paper, Harvard University, <https://scholar.harvard.edu/files/rkcarney/files/carneyenos.pdf>.
- Gadarian, Shana Kushner and Bethany Albertson. 2014. “Anxiety, immigration, and the search for information.” *Political Psychology* 35(2):133–164.
- Hainmueller, Jens and Michael J Hiscox. 2010. “Attitudes toward highly skilled and low-skilled immigration: Evidence from a survey experiment.” *American Political Science Review* 104(01):61–84.
- Hankinson, Michael. 2018. “When do renters behave like homeowners? High rent, price anxiety, and NIMBYism.” *American Political Science Review* 112(3):473–493.
- Kam, Cindy D and Elizabeth N Simas. 2010. “Risk orientations and policy frames.” *The Journal of Politics* 72(02):381–396.
- Kaufman, Aaron. 2018. “An automated method to estimate bias in survey questions.” Working Paper, Harvard University. Draft available at <http://www.aaronrkaufman.com/paper/surveybias/>.
- Kaufman, Aaron, Gary King and Mayya Komisarchik. Forthcoming. “How to measure legislative district compactness if you only know it when you see it.” *American Journal of Political Science* .
- Kaufman, Aaron and Matthew Kim. 2017. “Sequential blocked randomization for internet-based survey experiments.” Working Paper, Harvard University.
- Krosch, Amy R and David M Amodio. 2014. “Economic scarcity alters the perception of race.” *Proceedings of the National Academy of Sciences* 111(25):9079–9084.
- Krosch, Amy R, Leslie Berntsen, David M Amodio, John T Jost and Jay J Van Bavel. 2013. “On the ideology of hypodescent: Political conservatism predicts categorization of racially ambiguous faces as Black.” *Journal of Experimental Social Psychology* 49(6):1196–1203.

- Mahler, Daniel. 2016. “Do altruistic preferences matter for voting outcomes?” Working Paper, University of Copenhagen. Draft available at: [https://editorialexpress.com/cgi-bin/conference/download.cgi?db\\_name=SCW2016&paper\\_id=126](https://editorialexpress.com/cgi-bin/conference/download.cgi?db_name=SCW2016&paper_id=126).
- Mozer, Reagan, Luke Miratrix, Aaron R. Kaufman and L. Jason Anastasopoulos. 2018. “Matching with text data: An experimental evaluation of methods for matching documents and of measuring match quality.” Draft available at <https://arxiv.org/abs/1801.00644>.
- Rasinski, Kenneth A. 1989. “The effect of question wording on public support for government spending.” *Public Opinion Quarterly* 53(3):388–394.
- Saha, Sparsha and Ana Catalano Weeks. 2018. “Ambitious women: Gender and voter perceptions of candidate ambition.” Working paper, Harvard University.
- Sears, David O. and Donald R. Kinder. 1971. Racial tensions and voting in Los Angeles. In *Los Angeles: viability and prospects for metropolitan leadership*, ed. Werner Z Hirsch. New York: Praeger.
- Tomz, Michael. 2007. “Domestic audience costs in international relations: An experimental approach.” *International Organization* 61(04):821–840.
- Tversky, Amos and Daniel Kahneman. 1981. “The framing of decisions and the psychology of choice.” *Science* 211(4481):453–458.
